# Supplementary material for: Influence of a High-Impact Multidimensional Rehabilitation Program on the Gut Microbiota of Patients with Multiple Sclerosis
Source: MDPI journal article supplement (doi:10.3390/ijms22137173), 2021-07-02
Supplement: s1 [file s1]

## Supplementary Materials

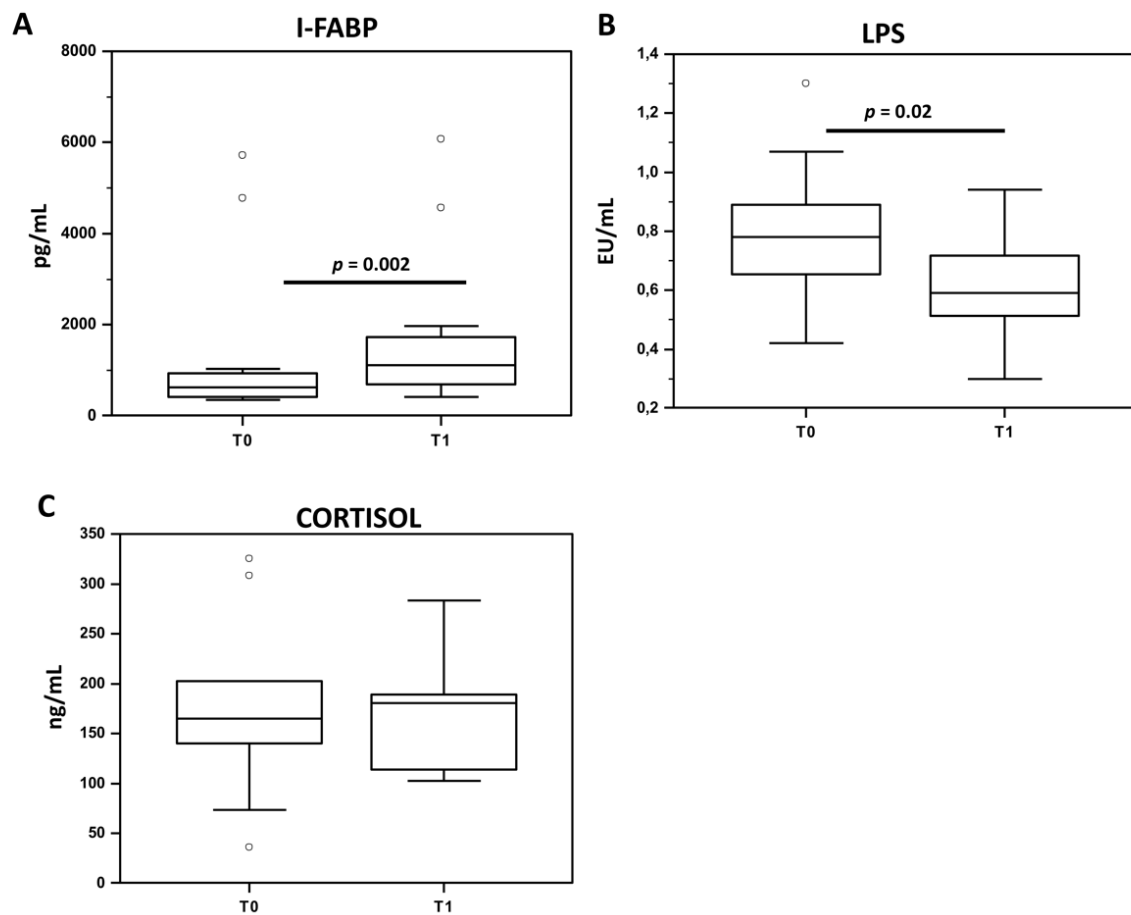

**Figure S1. Serum I-FABP, LPS and cortisol concentrations in multiple sclerosis patients before and after a brief high-impact multidimensional rehabilitation program.** Boxplots showing the distribution of the amounts of I-FABP (A), LPS (B) and cortisol (C) in the serum of multiple sclerosis patients before (T0) and after (T1) the rehabilitation program. A statistically significant difference was observed for I-FABP and LPS ( $p \leq 0.02$ , Wilcoxon test).

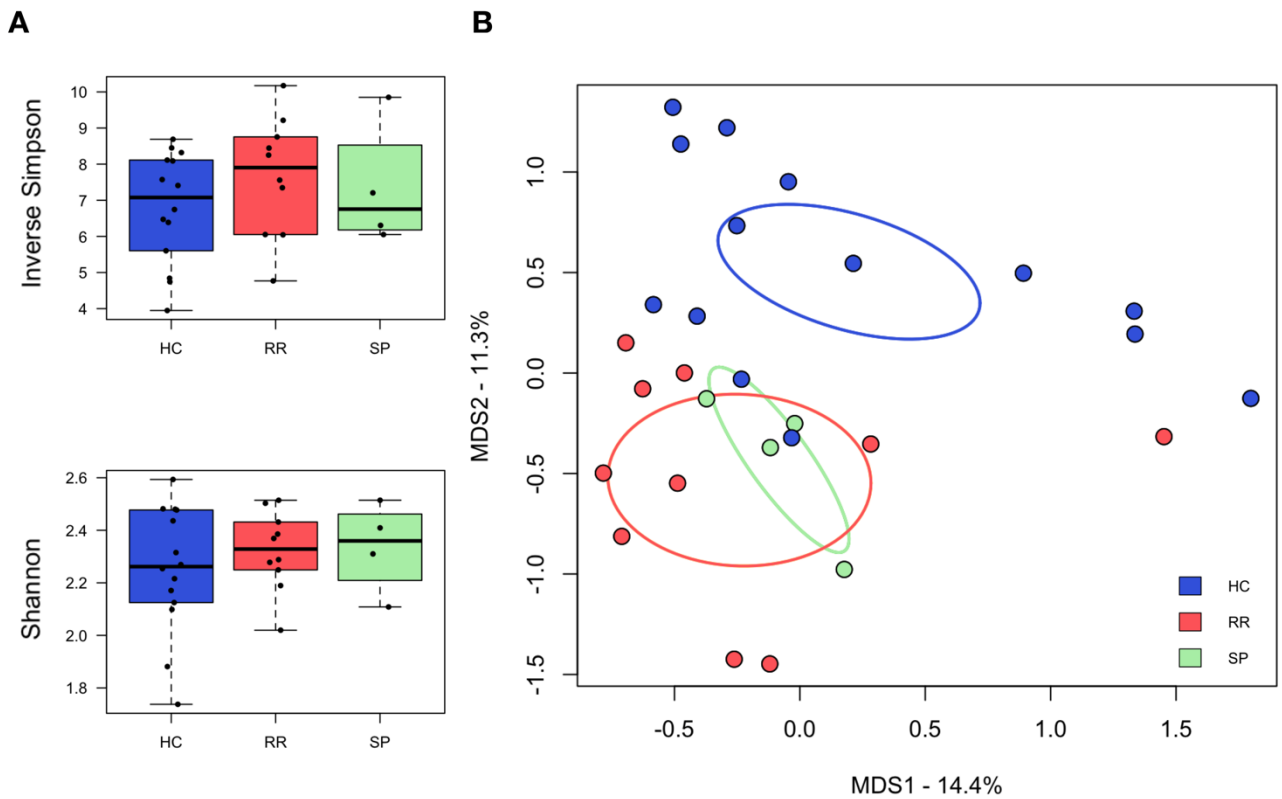

**Figure S2. The gut microbiota diversity of relapsing-remitting and secondary-progressive multiple sclerosis patients at baseline compared to healthy subjects.** (A) Boxplots showing the distribution of alpha diversity, measured using the Inverse Simpson (top) and Shannon (bottom) indices, for the gut microbiota of multiple sclerosis patients with relapsing-remitting and secondary-progressive disease (RR and SP, respectively), as well as for age- and sex-matched healthy subjects across Italy (HC). (B) Principal Coordinates Analysis (PCoA) of the gut microbial communities, based on the Jaccard similarity coefficient. A significant separation between multiple sclerosis patients and HC was found regardless of the disease severity ( $p \leq 5 \times 10^{-4}$ , permutation test with pseudo- $F$  ratios). Only a tendency to segregation was observed between SP and RR patients ( $p = 0.08$ ).

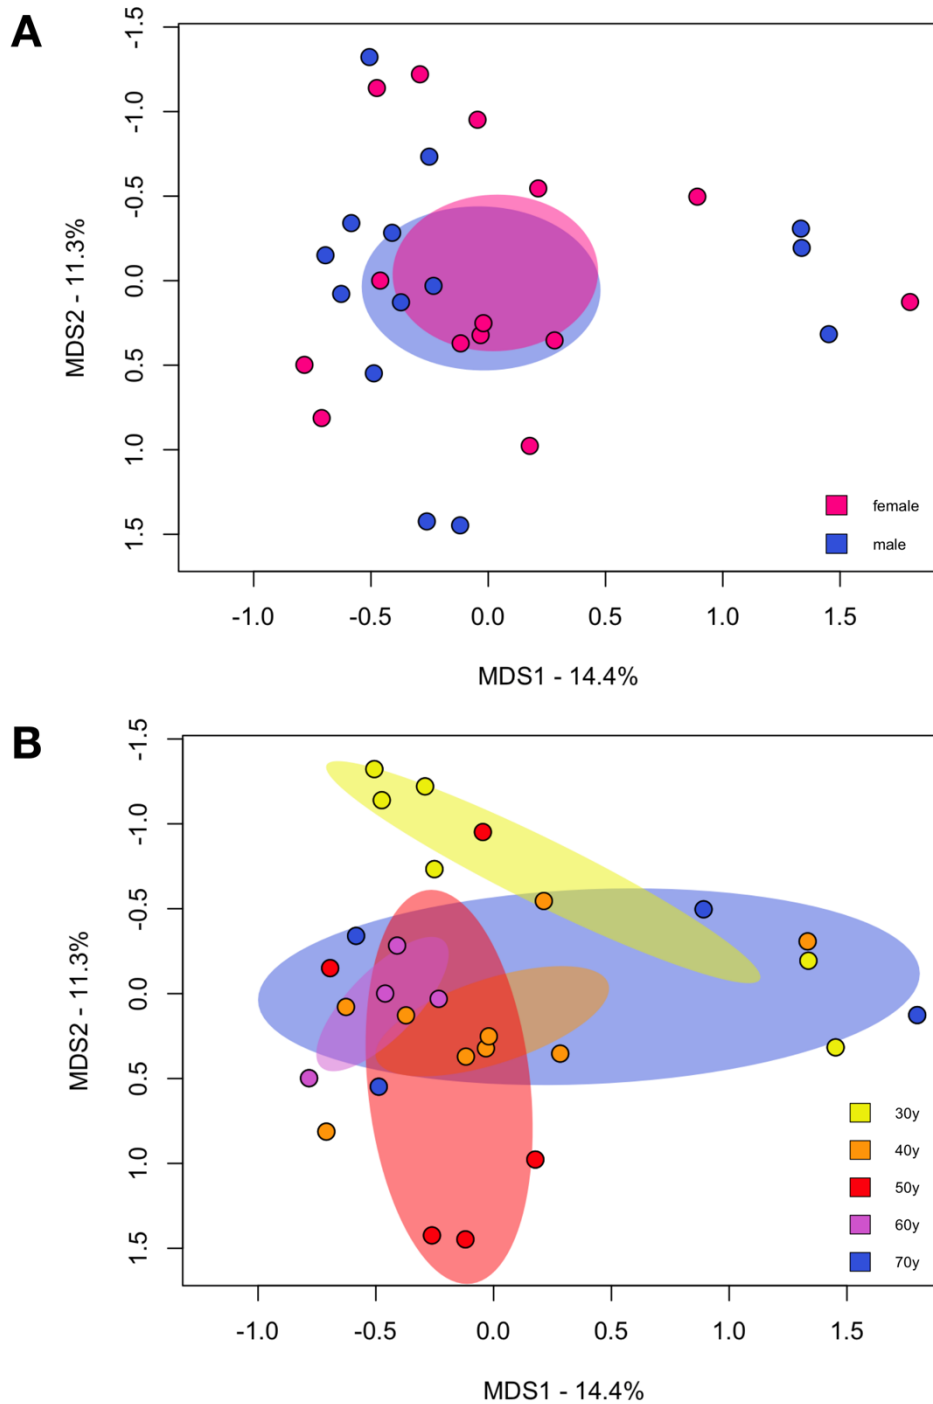

**Figure S3. The multiple sclerosis-associated dysbiosis is not affected by microbiota-associated confounding factors.** PCoA based on Jaccard similarity coefficient of the gut microbial communities of multiple sclerosis patients and age- and sex-matched healthy subjects across Italy, stratified by gender (female vs male, **A**) and age group (30 to 70 years, **B**). No significant segregation was observed ( $p \geq 0.3$ , permutation test with pseudo- $F$  ratio). See also Figure 1 and Figure S1.

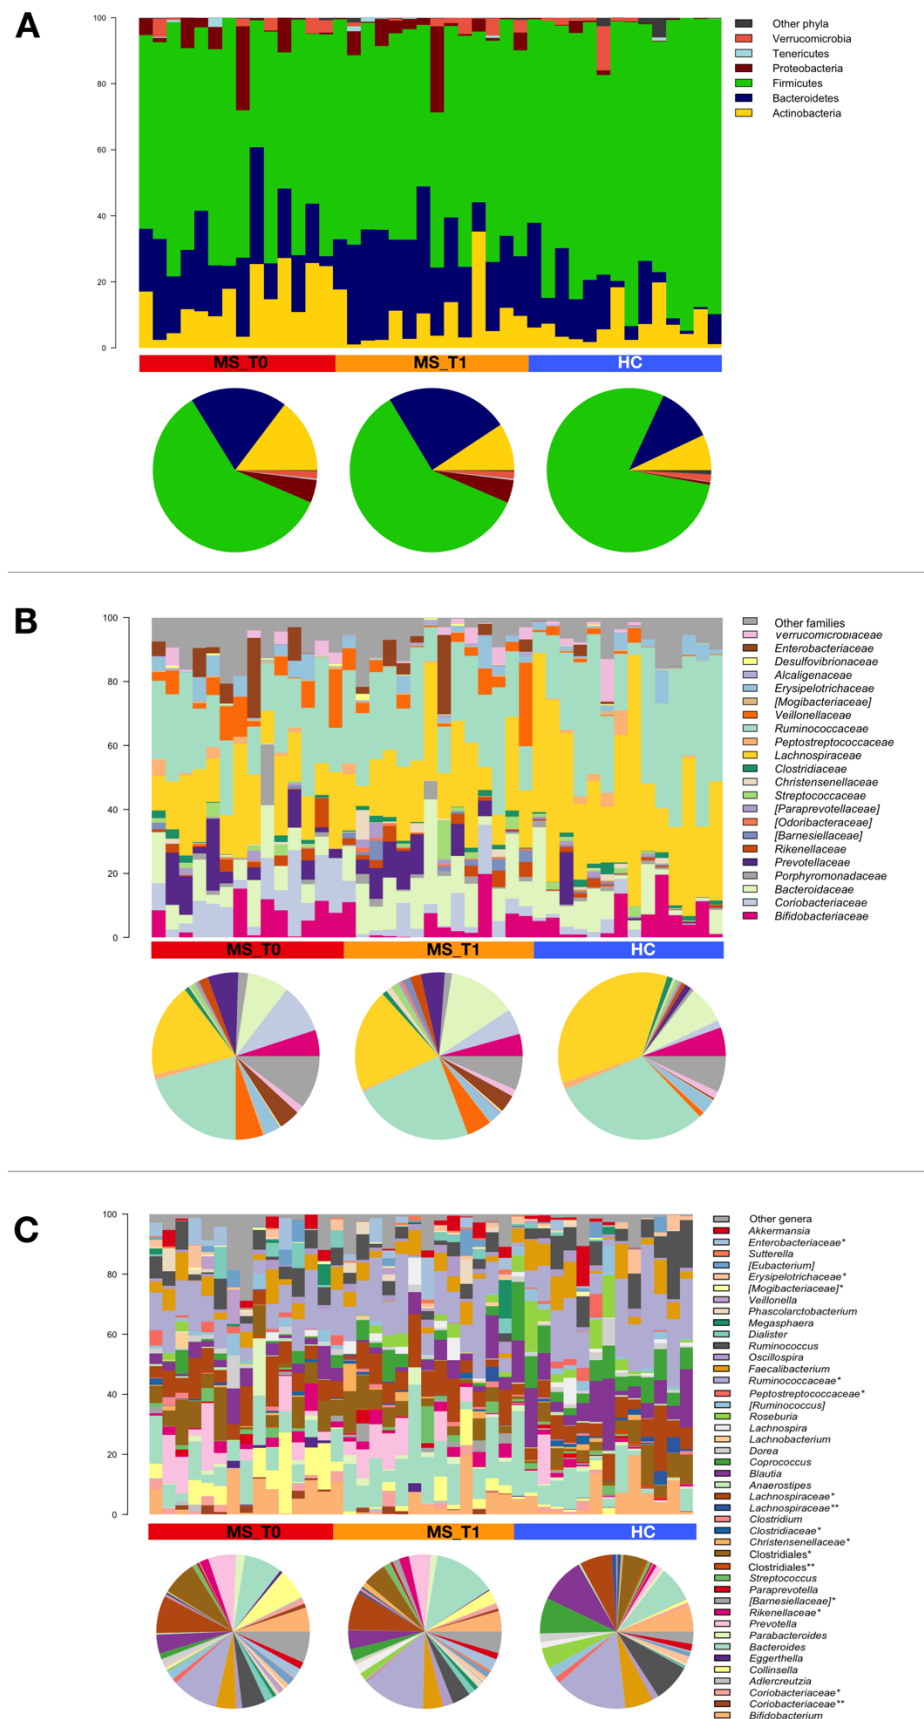

**Figure S4. Gut microbiota profiles of multiple sclerosis patients before and after the rehabilitation program, compared to healthy subjects.** Bar plots and pie charts summarizing the phylum- (A), family- (B) and genus-level (C) composition of the gut microbiota of multiple sclerosis patients at baseline (MS\_T0) and at the end of the rehabilitation program (MS\_T1), and of age/sex-matched healthy Italian subjects (HC). Only taxa with relative abundance  $\geq 0.5\%$  in at least 10% of samples are represented.

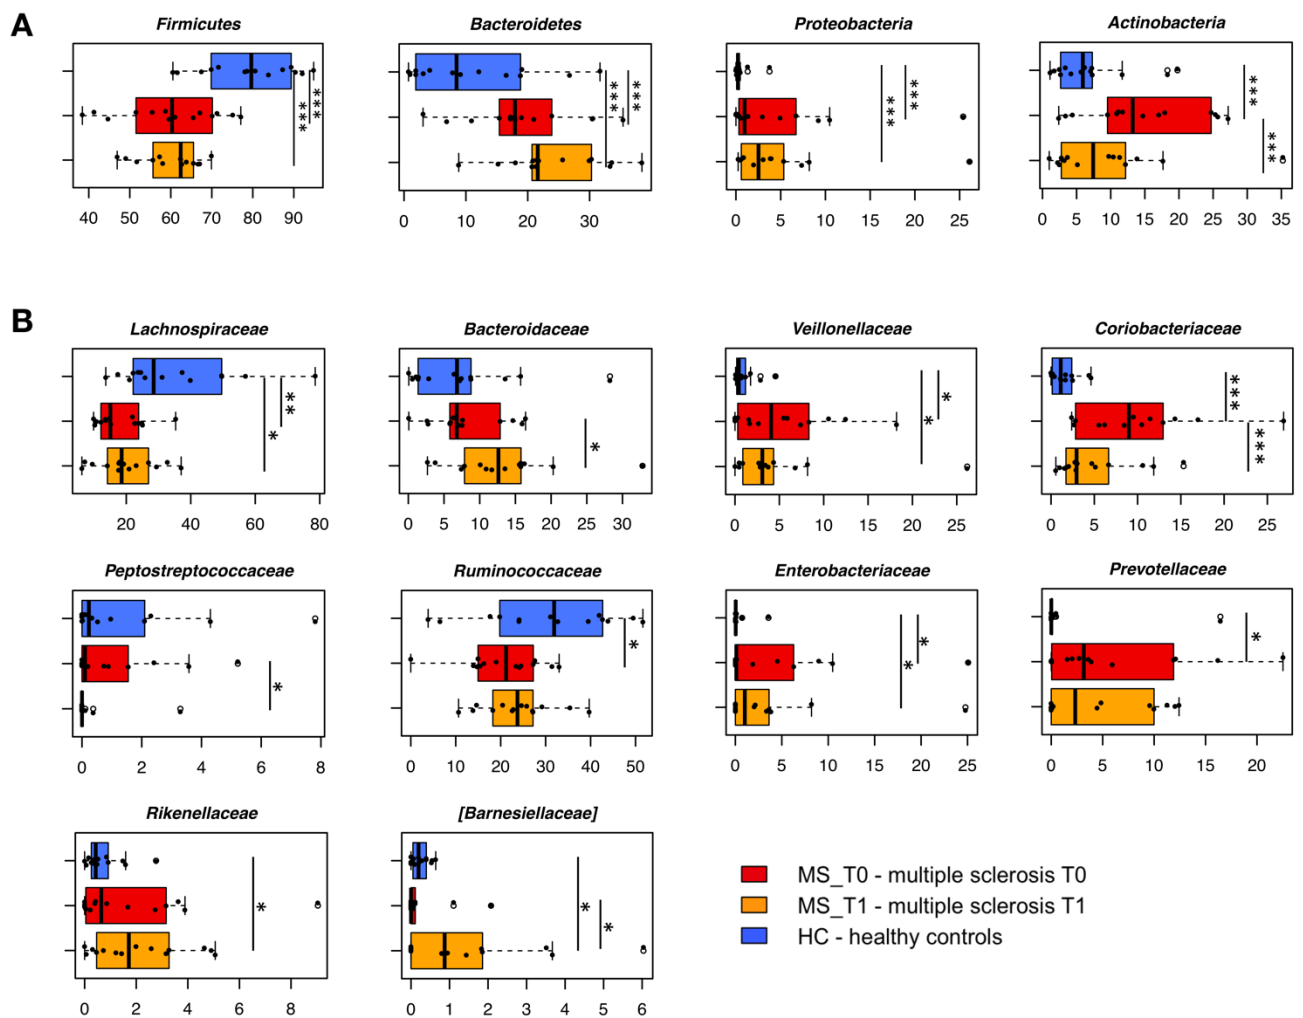

**Figure S5. The phylum- and family-level dysbiotic layout in multiple sclerosis patients is partially recovered following the rehabilitation program.** Boxplots showing the relative abundance distribution of bacterial phyla (A) and families (B) significantly different between the study groups [multiple sclerosis patients before (MS\_T0, red) and after the rehabilitation program (MS\_T1, orange), and age/sex-matched healthy Italian subjects (HC, blue)]. \*,  $p \leq 0.05$ ; \*\*,  $p \leq 0.01$ ; \*\*\*,  $p \leq 0.001$ ; Wilcoxon test.
